# Supplementary material
Source: PubMed Central journal article supplement (PMC6703706)
Supplement: joces-132-231241-s1.pdf [file joces-132-231241-s1.pdf]

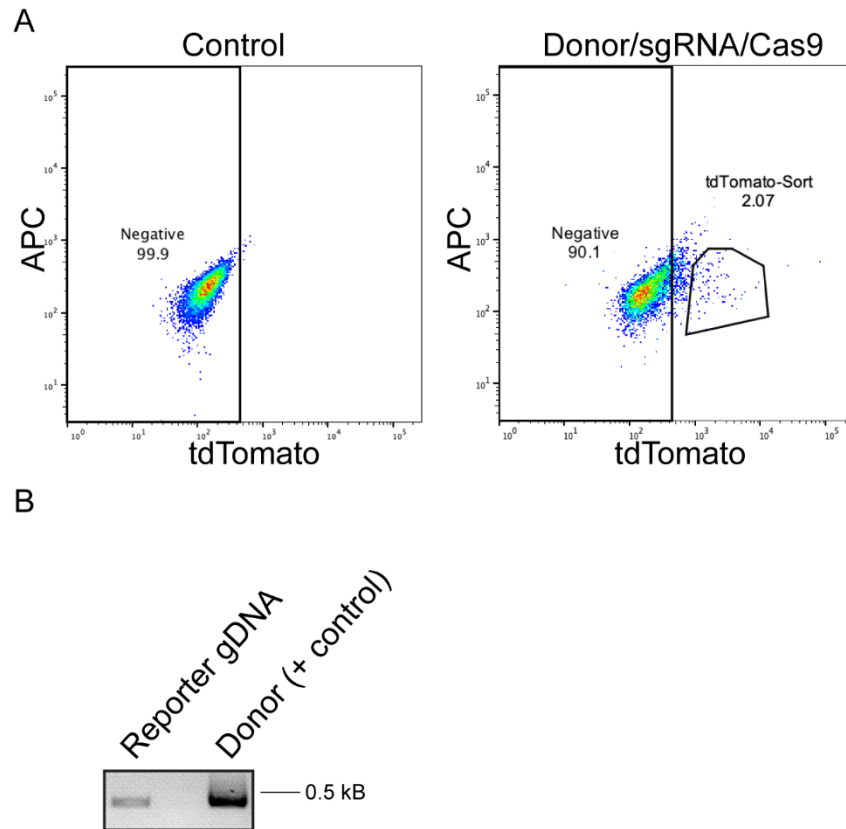

**Fig. S1. Generation of integrin  $\beta 4$  reporter 4T1 cells.** (A) 4T1 cells were transfected with donor plasmid and sgRNA #2/Cas9 and processed for flow cytometry to quantify tdTomato positive cells, which were subsequently processed for single-cell sorting. (B) Genomic DNA from clones described (A) was isolated and processed for PCR to determine the correct genomic insert of tdTomato.

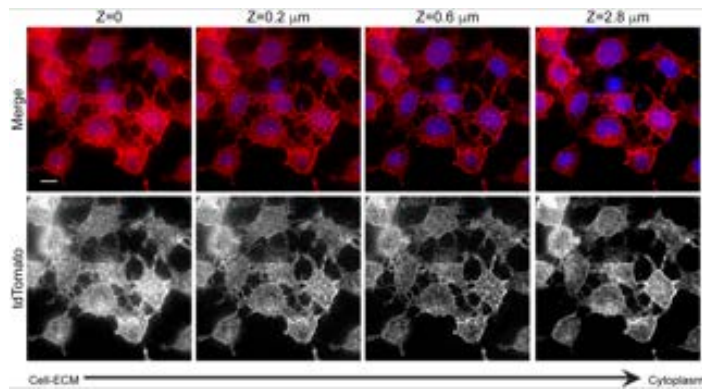

**Fig. S2.  $\beta$ 4-tdTomato is expressed on the surface of comma-d1 reporter cells.** A Z-stack was performed to refine the localization of the tdTomato signal in adherent reporter cells. Z-stack slices moving from the basal surface (Z=0 microns) towards the apical surface (Z=2.8 microns) demonstrate that the tdTomato signal is predominately on the cell surface. Top panel: Live cell fluorescence images show the distribution of tdTomato (red), and nuclei (blue). Bottom panel: Grey scale images show tdTomato only. Scale bar: 10 microns.

5' genomic locus to reporter cassette

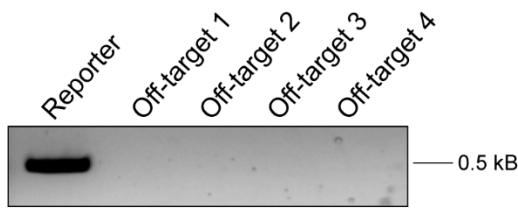

Reporter cassette to 3' genomic locus

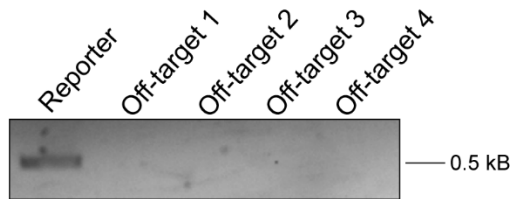

| Rank | Genomic Locus              | Target Sequence      | Primer Sequences                                  |
|------|----------------------------|----------------------|---------------------------------------------------|
| 1    | chr12: 100944782-100944804 | AGGGGGCGGGGGGAGGTTC  | F: agagcagcaccacaagtct<br>R: caggggaaaacatctcagga |
| 2    | chr13:4621969-4621991      | AAGGGGCGTGGGGGAGGTTC | F: ccaaaggctgctagtgaag<br>R:gagtagcggccagagaaatg  |
| 3    | chr6: 70352481-70352503    | CTCGGGGGGGGGGGAGGTTC | F: atccaaaagtccccatac<br>R: accctgtctccatctgttg   |
| 4    | chr11:119990864-119990886  | CTGGAGCACTGGGGAGGTTC | F: ggaatgagtggatccaaga<br>R: accagtctgagaaggcctga |

**Fig. S3. Off-target analysis of integrin  $\beta$ 4 reporter comma-d1 cells.** Genomic DNA was isolated from comma-d1 reporter cells and the indicated potential off-target sites were screened by PCR to determine reporter cassette integration. The four genomic loci screened, and the primer sequences utilized are also shown.

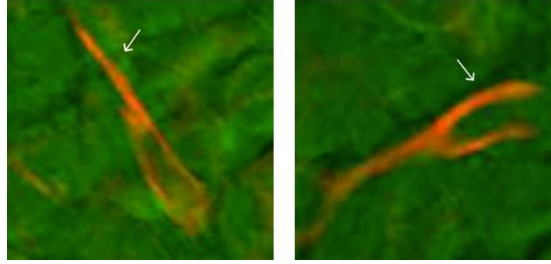

**Fig. S4. Integrin  $\beta$ 4 is present in cell protrusions of migrating cells.** Inset of still images of migrating cells from Movies 3 and 5 that show tdTomato/ $\beta$ 4 in cell protrusions formed by migrating cells. Arrows indicate cell protrusions.

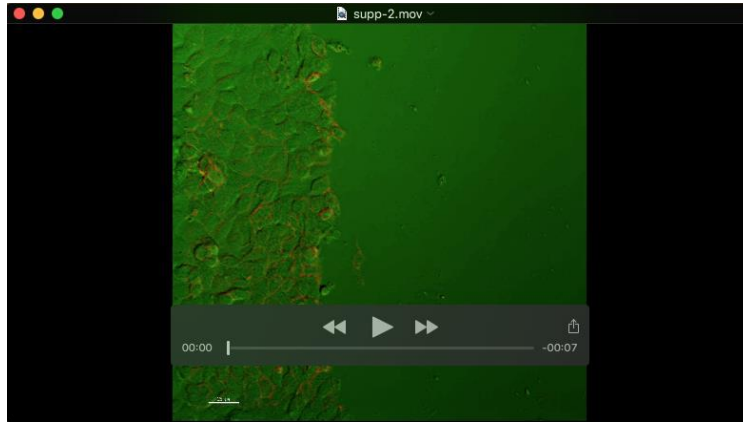

**Movie 1.** 18-hour movie of control  $\beta 4$  reporter comma-d1 cells in response to a scratch wound using a green differential interference contrast (DIC) background. Scale bar represents 25 micrometers.

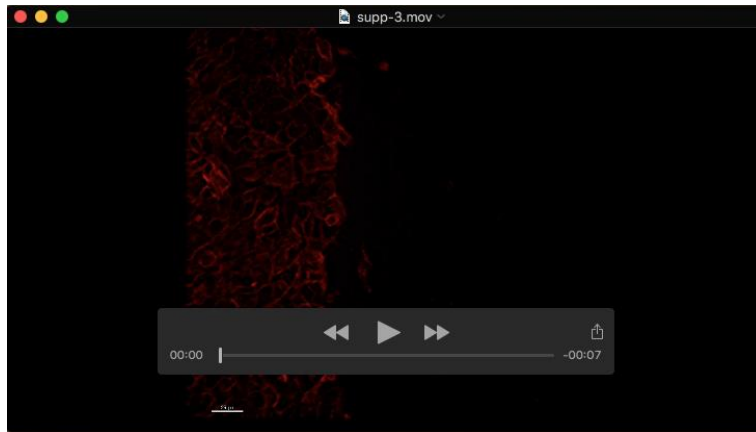

**Movie 2.** Movie 1 without a DIC background. Scale bar represents 25 micrometers.

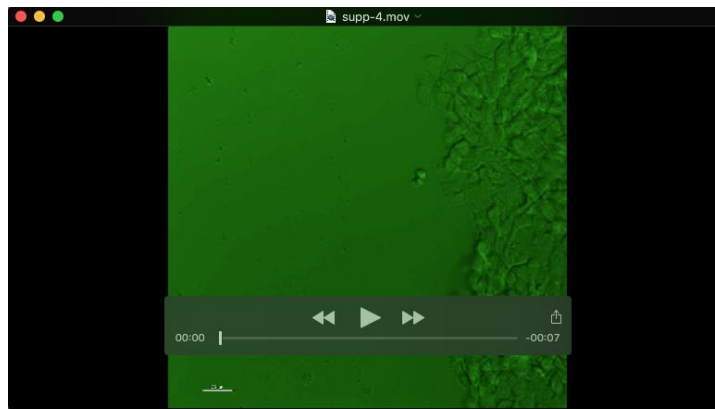

**Movie 3.** An 18-hour movie of YAP-transformed  $\beta 4$  reporter comma-d1 cells in response to a scratch wound using a green DIC background. Scale bar represents 25 micrometers.

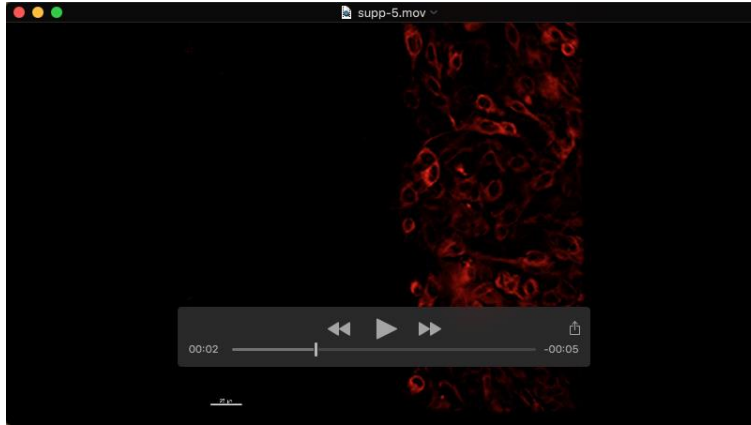

**Movie 4.** Movie 3 without a DIC background. Scale bar represents 25 micrometers.

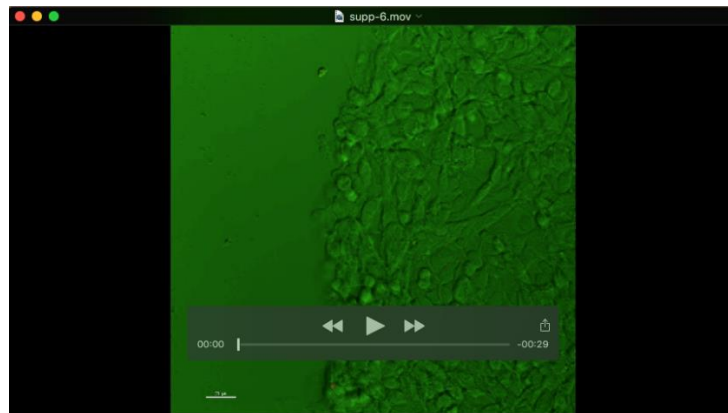

**Movie 5.** 72-hour movie of YAP-transformed  $\beta 4$  reporter comma-d1 cells in response to a scratch wound using a green DIC background. Scale bar represents 25 micrometers.

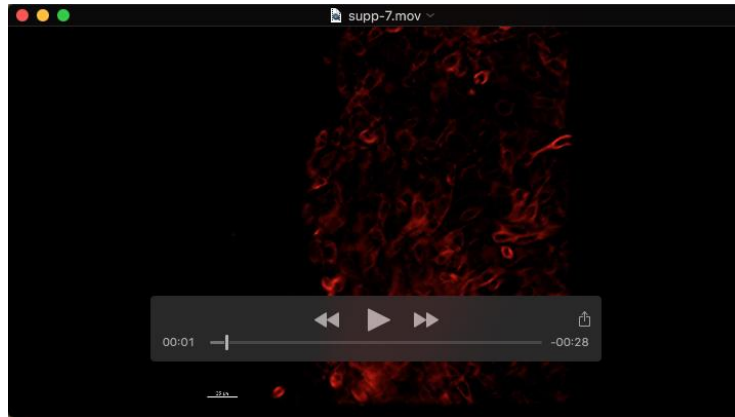

**Movie 6.** Movie 5 without a DIC background. Scale bar represents 25 micrometers.
